# Supplementary material for: The European Society of Gynaecological Oncology/European Society for Radiotherapy and Oncology/European Society of Pathology Guidelines for the Management of Patients with Cervical Cancer
Source: Springer Nature journal article supplement (doi:10.1007/s00428-018-2362-9), 2018-05-03
Supplement: MOESM2 [file 15739368]

**Appendix 2. Identification of previous initiatives**

| Literature search in MEDLINE | |
| --- | --- |
|  |  |
|  |  |
| Research period | No restriction |
|  |  |
|  |  |
| Indexing terms | clinical practice guidelines, evidence-based medicine, guidelines, methodology, recommendations, cervical cancer |
|  |  |
|  |  |
| Language | English |
|  |  |
|  |  |
| Study design | No restriction |
|  |  |

| Consulted websites (organism/agency, website) |
| --- |
|  |
| Alberta Clincal Practice Guidelines (ACPG): <http://www.topalbertadoctors.org/home/> |
|  |
|  |
| Australian Government Department of Health (AGDH): <http://www.health.gov.au/> |
|  |
|  |
| Agency for Healthcare Research and Quality (AHRQ): <http://www.guideline.gov/> |
|  |
|  |
| Agència de Qualitat i Avaluació Sanitàries de Catalunya (AQuAS): <http://aquas.gencat.cat/ca/> |
|  |
|  |
| American Society of Clinical Oncology (ASCO): <http://www.asco.org/> |
|  |
|  |
| British Columbia Cancer Agency (BCCA): <http://www.bccancer.bc.ca/default.htm> |
|  |
|  |
| Canadian Agency for Drugs and Technologies in Health (CADTH): <http://www.cadth.ca/> |
|  |
|  |
| Cancer Care Ontario (CCO): <https://www.cancercare.on.ca/> |
|  |
|  |
| Comité de l’Evolution des Pratiques en Oncologie (CEPO): <http://www.msss.gouv.qc.ca/index.php> |
|  |
|  |
| Coordination of Cancer Clinical Practice Guidelines in Europe (CoCanCPG): <http://www.cocancpg.eu/> |
|  |
|  |
| Coordination pour la Mesure de la Performance et l’Amélioration de la Qualité, Hôpital, Patient, Sécurité, Territoire (COMPAQ-HPST): <http://www.compaqhpst.fr/fr/> |
|  |
|  |
| European Society of Medical Oncology (ESMO): <http://www.esmo.org/> |
|  |
|  |
| Guidelines International Network (GIN): <http://www.g-i-n.net/> |
|  |
|  |
| Haute Autorité de santé (HAS): <http://www.has-sante.fr/portail/jcms/fc_1249588/fr/accueil> |
|  |
|  |
| International Network of Agencies for Health Technology Assessment (INAHTA): <http://www.inahta.org/> |
|  |
|  |
| Institut National du Cancer (INCa): <http://www.e-cancer.fr/> |
|  |
|  |
| Institut National d’Excellence en Santé et en Services Sociaux (INESSS): <http://www.inesss.qc.ca/> |
|  |
|  |
| Centre fédéral d’expertise des soins de santé (KCE): <https://kce.fgov.be/fr> |
|  |
|  |
| Medical Services Advisory Committee (MSAC): <http://www.msac.gov.au/> |
|  |
|  |
| National Comprehensive Cancer Network (NCCN): <http://www.nccn.org/> |
|  |
|  |
| National Health and Medical Research Council (NHMRC): <http://www.nhmrc.gov.au/> |
|  |
|  |
| National Health Service (NHS): <http://www.nhs.uk/Pages/HomePage.aspx> |
|  |
|  |
| National Institute for Health and Care Excellence (NICE): <http://www.nice.org.uk/> |
|  |
|  |
| New Zealand Guidelines Group (NZGG): <http://www.health.govt.nz/> |
|  |
|  |
| Scottish Intercollegiate Guidelines Network (SIGN): <http://www.sign.ac.uk/> |
|  |

| Previous initiatives identified |
| --- |
|  |
| ACOG (2014). "Committee Opinion No. 584: oocyte cryopreservation." Obstet Gynecol **123**(1): 221-222. |
|  |
|  |
| Amant, F., M. J. Halaska, et al. (2014). "Gynecologic cancers in pregnancy: guidelines of a second international consensus meeting." Int J Gynecol Cancer **24**(3): 394-403. |
|  |
|  |
| Balleyguier, C., E. Sala, et al. (2011). "Staging of uterine cervical cancer with MRI: guidelines of the European Society of Urogenital Radiology." Eur Radiol **21**(5): 1102-1110. |
|  |
|  |
| Chuang, L. T., S. Feldman, et al. (2016). "Management and Care of Women With Invasive Cervical Cancer: ASCO Resource-Stratified Clinical Practice Guideline." J Clin Oncol **34**(27): 3354-3355. |
|  |
|  |
| Chuang, L. T., S. Temin, et al. (2016). "Management and Care of Women With Invasive Cervical Cancer: American Society of Clinical Oncology Resource-Stratified Clinical Practice Guideline Summary." J Oncol Pract **12**(7): 693-696. |
|  |
|  |
| Dimopoulos, J. C., P. Petrow, et al. (2012). "Recommendations from Gynaecological (GYN) GEC-ESTRO Working Group (IV): Basic principles and parameters for MR imaging within the frame of image based adaptive cervix cancer brachytherapy." Radiother Oncol **103**(1): 113-122. |
|  |
|  |
| Ebina, Y., N. Yaegashi, et al. (2015). "Japan Society of Gynecologic Oncology guidelines 2011 for the treatment of uterine cervical cancer." Int J Clin Oncol **20**(2): 240-248. |
|  |
|  |
| Elit, L., E. B. Kennedy, et al. (2016). "Follow-up for cervical cancer: a Program in Evidence-Based Care systematic review and clinical practice guideline update." Curr Oncol **23**(2): 109-118. |
|  |
|  |
| Haie-Meder, C., R. Potter, et al. (2005). "Recommendations from Gynaecological (GYN) GEC-ESTRO Working Group (I): concepts and terms in 3D image based 3D treatment planning in cervix cancer brachytherapy with emphasis on MRI assessment of GTV and CTV." Radiother Oncol **74**(3): 235-245. |
|  |
|  |
| Hellebust, T.P., C. Kirisits *et al.* (2010). “Recommendations from Gynaecological (GYN) GEC-ESTRO Working Group: considerations and pitfalls in commissioning and applicator reconstruction in 3D image-based treatment planning of cervix cancer brachytherapy”. Radiother Oncol **96**, 153-160. |
|  |
|  |
| Hirte, H., E. B. Kennedy, et al. (2015). "Systemic therapy for recurrent, persistent, or metastatic cervical cancer: a clinical practice guideline." Curr Oncol **22**(3): 211-219. |
|  |
|  |
| Lee, L. J., I. J. Das, et al. (2012). "American Brachytherapy Society consensus guidelines for locally advanced carcinoma of the cervix. Part III: low-dose-rate and pulsed-dose-rate brachytherapy." Brachytherapy **11**(1): 53-57. |
|  |
|  |
| Lim, K., W. Jr. Small*, et al.* (2011). Consensus guidelines for delineation of clinical target volume for intensity-modulated pelvic radiotherapy for the definitive treatment of cervix cancer. Int J Radiat Oncol Biol Phys **79**, 348-355. |
|  |
|  |
| Marth, C., F. Landoni, et al. (2017). "Cervical cancer: ESMO Clinical Practice Guidelines for diagnosis, treatment and follow-up." Ann Oncol **28**(suppl_4): iv72-iv83. |
|  |
|  |
| Morice, P., F. Narducci, et al. (2009). "French recommendations on the management of invasive cervical cancer during pregnancy." Int J Gynecol Cancer **19**(9): 1638-1641. |
|  |
|  |
| NCCN (2017). "Cervical Cancer - NCCN Clinical Practice Guidelines in Oncology (version I. 2017 - October 10, 2016)." https://www.nccn.org/professionals/physician_gls/pdf/cervical.pdf. |
|  |
|  |
| NICE (2015). "Cervical Cancer." http://pathways.nice.org.uk/pathways/cervical-cancer. |
|  |
|  |
| Oaknin, A., M. J. Rubio, et al. (2015). "SEOM guidelines for cervical cancer." Clin Transl Oncol **17**(12): 1036-1042. |
|  |
|  |
| PCASRM/ASRM (2014). "Ovarian tissue cryopreservation: a committee opinion." Fertil Steril **101**(5): 1237-1243. |
|  |
|  |
| PCASRM/SART (2013). "Mature oocyte cryopreservation: a guideline." Fertil Steril **99**(1): 37-43. |
|  |

| Previous initiatives identified |
| --- |
|  |
| Peccatori, F. A., H. A. Azim, Jr., et al. (2013). "Cancer, pregnancy and fertility: ESMO Clinical Practice Guidelines for diagnosis, treatment and follow-up." Ann Oncol **24 Suppl 6**: vi160-170. |
|  |
|  |
| Potter, R., C. Haie-Meder, et al. (2006). "Recommendations from gynaecological (GYN) GEC ESTRO working group (II): concepts and terms in 3D image-based treatment planning in cervix cancer brachytherapy-3D dose volume parameters and aspects of 3D image-based anatomy, radiation physics, radiobiology." Radiother Oncol **78**(1): 67-77. |
|  |
|  |
| Pötter R., K. Tanderup, et al (2018). The EMBRACE II study: The outcome and prospect of two decades of evolution within the GEC-ESTRO GYN working group and the EMBRACE studies. Clinical and Translational Radiation Oncology, (accepted for publication). |
|  |
|  |
| Salani, R., F. J. Backes, et al. (2011). "Posttreatment surveillance and diagnosis of recurrence in women with gynecologic malignancies: Society of Gynecologic Oncologists recommendations." Am J Obstet Gynecol **204**(6): 466-478. |
|  |
|  |
| SIGN (2008). "Management of cervical cancer." http://www.sign.ac.uk/pdf/sign99.pdf. |
|  |
|  |
| Small, W., Jr., S. Beriwal, et al. (2012). "American Brachytherapy Society consensus guidelines for adjuvant vaginal cuff brachytherapy after hysterectomy." Brachytherapy **11**(1): 58-67. |
|  |
|  |
| Small, W., Jr., L.K. Mell*, et al.* (2008). Consensus guidelines for delineation of clinical target volume for intensity-modulated pelvic radiotherapy in postoperative treatment of endometrial and cervical cancer. Int J Radiat Oncol Biol Phys **71**, 428-434. |
|  |
|  |
| Suneja, G., D. Brown, et al. (2017). "American Brachytherapy Society: Brachytherapy treatment recommendations for locally advanced cervix cancer for low-income and middle-income countries." Brachytherapy **16**(1): 85-94. |
|  |
|  |
| Taylor, A., A.G. Rockall, A.G*, et al.* (2005). Mapping pelvic lymph nodes: guidelines for delineation in intensity-modulated radiotherapy. Int J Radiat Oncol Biol Phys **63**, 1604-1612 (2005) |
|  |
|  |
| Vergote, I., J. Vlayen, et al. (2011). "Recommandations de bonne pratique pour la prise en charge du cancer du col de l'utérus. Good Clinical Practice (GCP). Bruxelles: Centre fédéral d'expertise des soins de santé (KCE). KCE report 168B." |
|  |
|  |
| Viswanathan, A. N., S. Beriwal, et al. (2012). "American Brachytherapy Society consensus guidelines for locally advanced carcinoma of the cervix. Part II: high-dose-rate brachytherapy." Brachytherapy **11**(1): 47-52. |
|  |
|  |
| Viswanathan, A. N. and B. Thomadsen (2012). "American Brachytherapy Society consensus guidelines for locally advanced carcinoma of the cervix. Part I: general principles." Brachytherapy **11**(1): 33-46. |
|  |
|  |
| WHO (2014). "Comprehensive Cervical Cancer Control. A guide to essential practice. Second edition." http://www.who.int/reproductivehealth/publications/cancers/cervical-cancer-guide/en/. |
|  |
